# Supplementary material
Source: PubMed Central journal article supplement (PMC6726980)
Supplement: ajcr0009-1734-f6.pdf [file ajcr0009-1734-f6.pdf]

## NOTCH signaling and wt-p53 interaction in GSCs

**Table S1.** Primary antibodies information

| Target            | Manufacturer          | Species | Dilution factor |
|-------------------|-----------------------|---------|-----------------|
| NOTCH1            | Cell signaling #4380  | Rabbit  | 1000            |
| NICD1             | Cell signaling #4147  | Rabbit  | 1000            |
| HES1              | Cell signaling #11988 | Rabbit  | 10000           |
| HES5              | Abcam #194111         | Rabbit  | 10000           |
| p53               | BD Pharmingen #554293 | Mouse   | 1000            |
| p21               | BD Pharmingen #556430 | Mouse   | 1000            |
| BAX               | Cell signaling #5023  | Rabbit  | 1000            |
| NESTIN            | Millipore #MAB5326    | Mouse   | 1000            |
| CD133             | Abcam #16518          | Rabbit  | 1000            |
| PARP1             | SCBT #7150            | Rabbit  | 500             |
| Cleaved PARP1     | Cell signaling #5625  | Rabbit  | 1000            |
| Cleaved caspase-3 | Cell signaling #9661  | Rabbit  | 1000            |

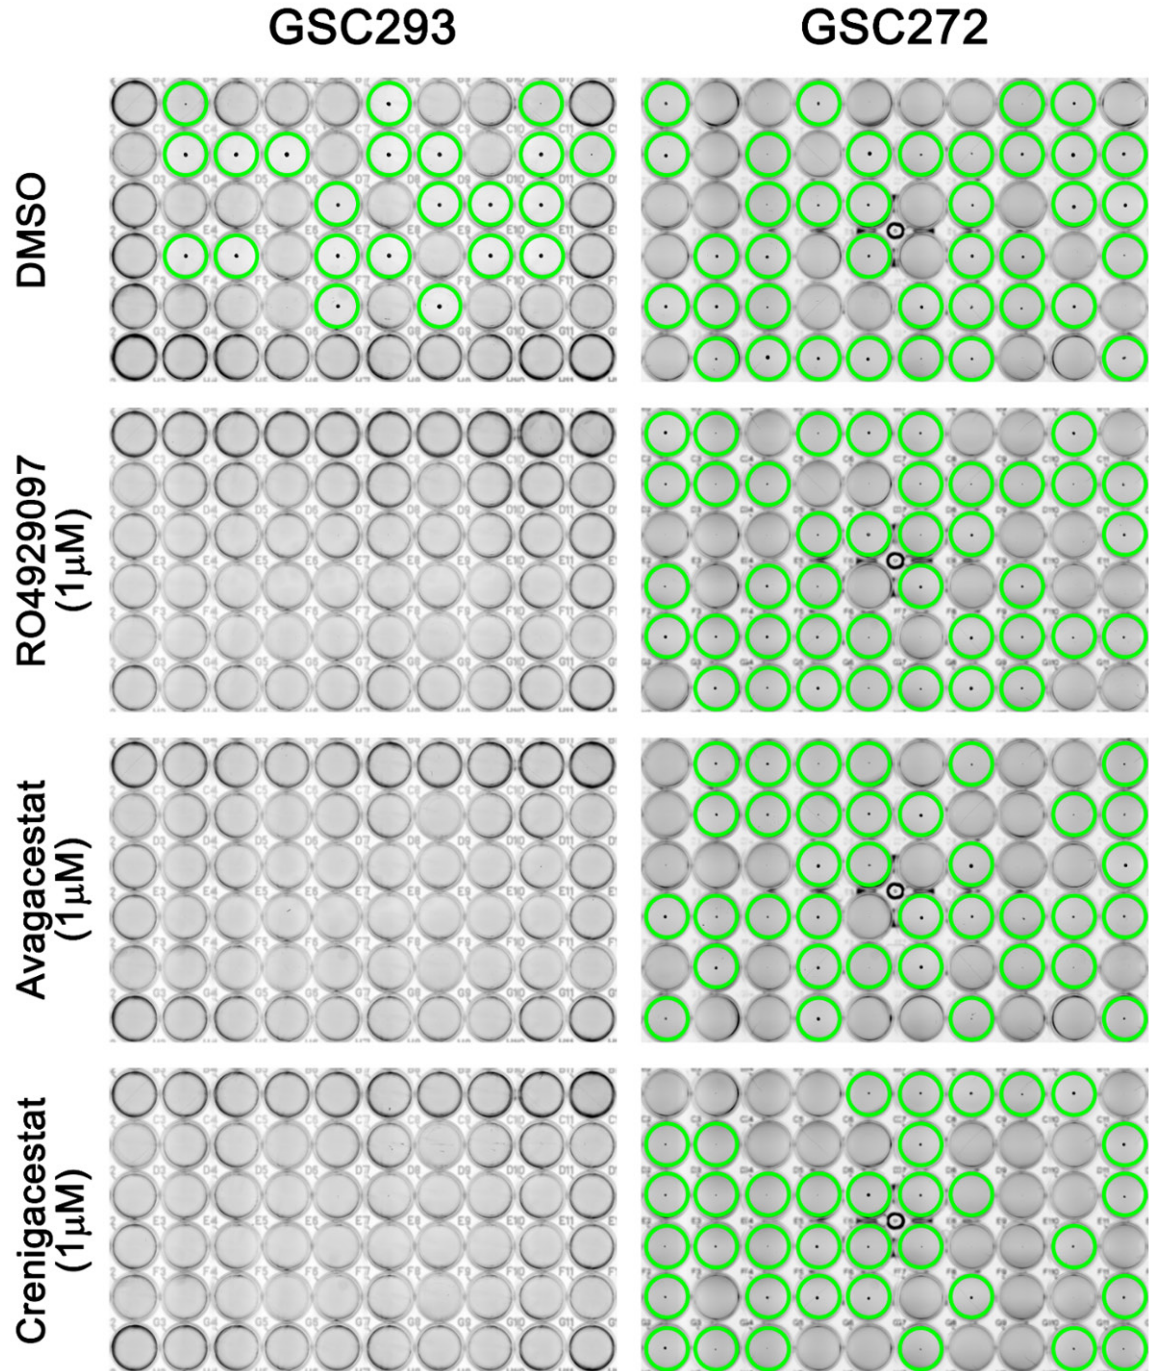

**Figure S1.** Representative images of GSC sphere formation after GSIs treatment. RO4929097, avagacestat, and crenigacestat treatment significantly attenuated sphere formation ability in GSC293 (wt-p53) but not in GSC272 (mut-p53). Wells with spheres were labeled by green circle. n = 3.

## NOTCH signaling and wt-p53 interaction in GSCs

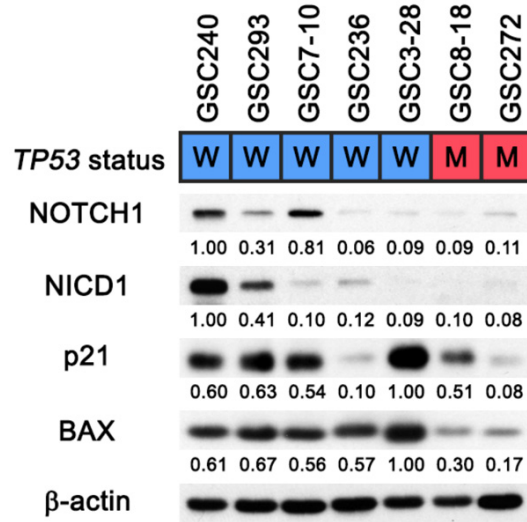

**Figure S2.** Expression of NOTCH1 signaling and p53 target genes in the validation group. The basal expression of NOTCH1 signaling (NOTCH1 and NICD1) and p53 target genes (p21 and BAX) was detected by Western blot analysis. *TP53* status (W: wild-type, M: mutant) is also shown. n = 3.

NOTCH signaling and wt-p53 interaction in GSCs

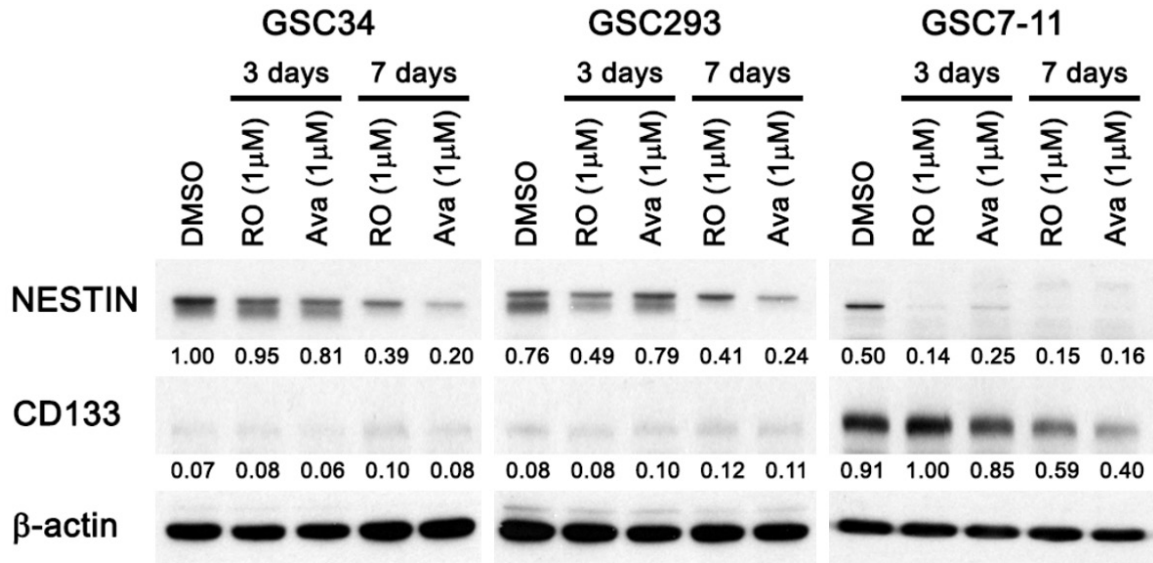

**Figure S3.** GSIs downregulated the expression of stem cell markers in GSCs. GSCs were treated by RO4929097 and avagacestat for 3 and 7 days. Both GSIs treatment decreased NESTIN and CD133 expression in GSCs. n = 3.

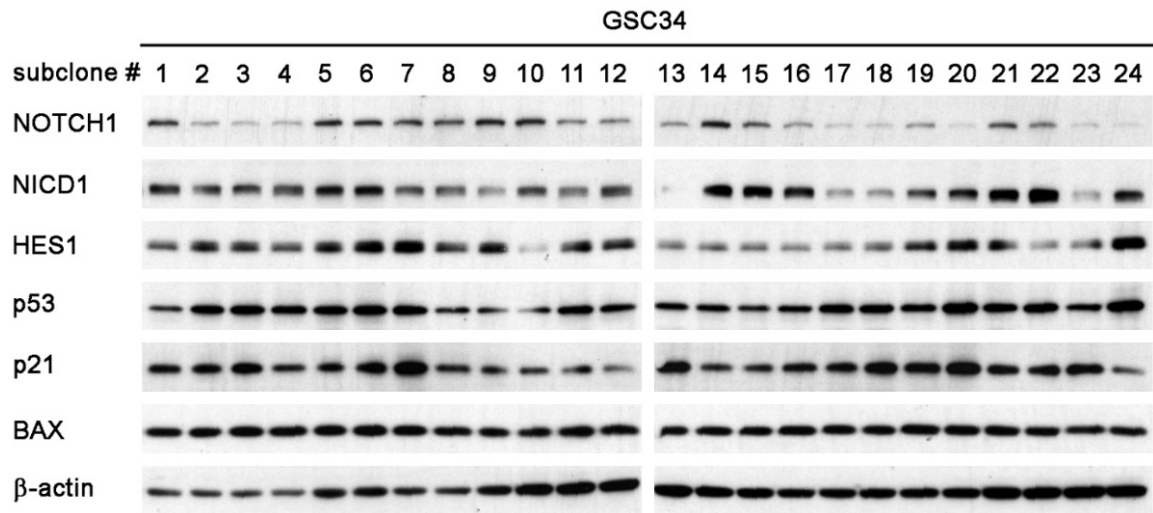

**Figure S4.** Expression of NOTCH1 and wt-p53 signaling in single cell-derived subclones of GSC34. Single cells from GSC34 were obtained by flowcytometry sorting. The single cell-derived subclones showed heterogenous expression pattern of NOTCH1 signaling and comparable wt-p53 activity.

## NOTCH signaling and wt-p53 interaction in GSCs

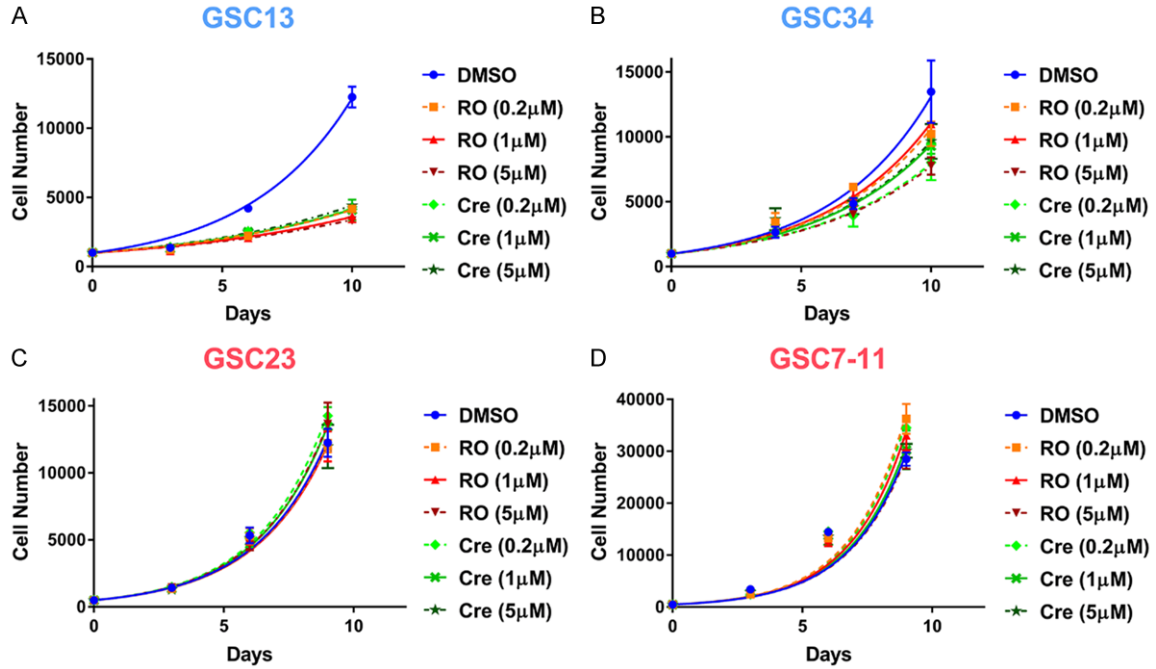

**Figure S5.** Effect of GSIs on GSC growth. The effect of GSIs (RO and crenigacestat) on GSC growth was tested in three doses (0.2 mM, 1 mM, and 5 mM). A, B. GSIs inhibited GSC13 (wt-p53) growth, but the effect was minimal in GSC34 (wt-p53). C, D. GSIs did not affect growth in mut-p53 GSCs (GSC23 and GSC7-11). n = 3. Blue font: wt-p53 cells. Red font: mut-p53 cells.

NOTCH signaling and wt-p53 interaction in GSCs

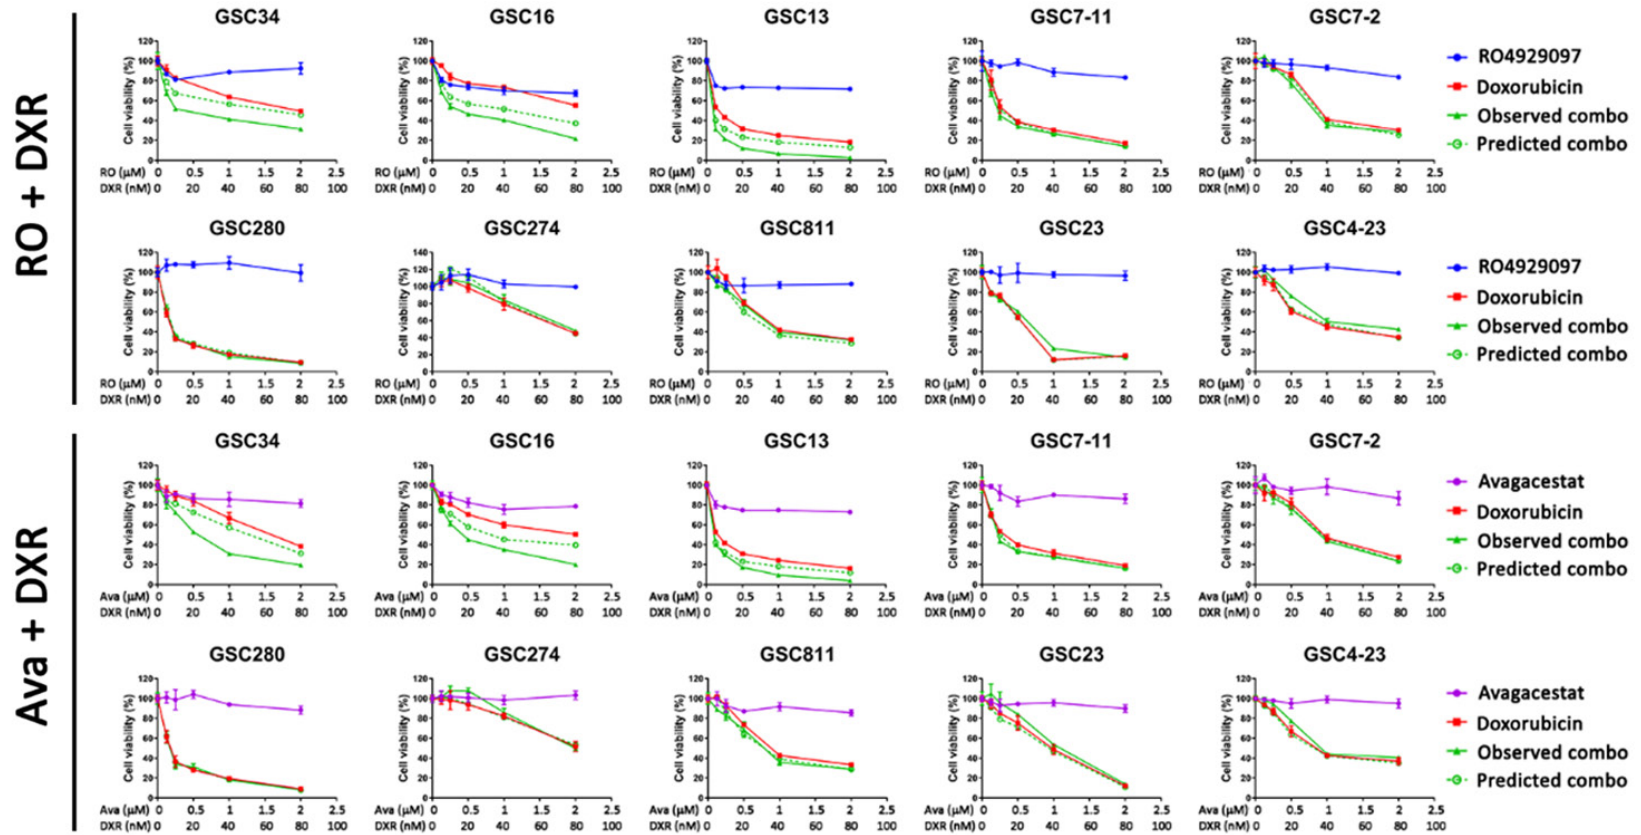

Figure S6. Screening group. The effect of GSI (RO or avagacestat) and doxorubicin treatment (5 days) on GSC proliferation. n = 3.

## NOTCH signaling and wt-p53 interaction in GSCs

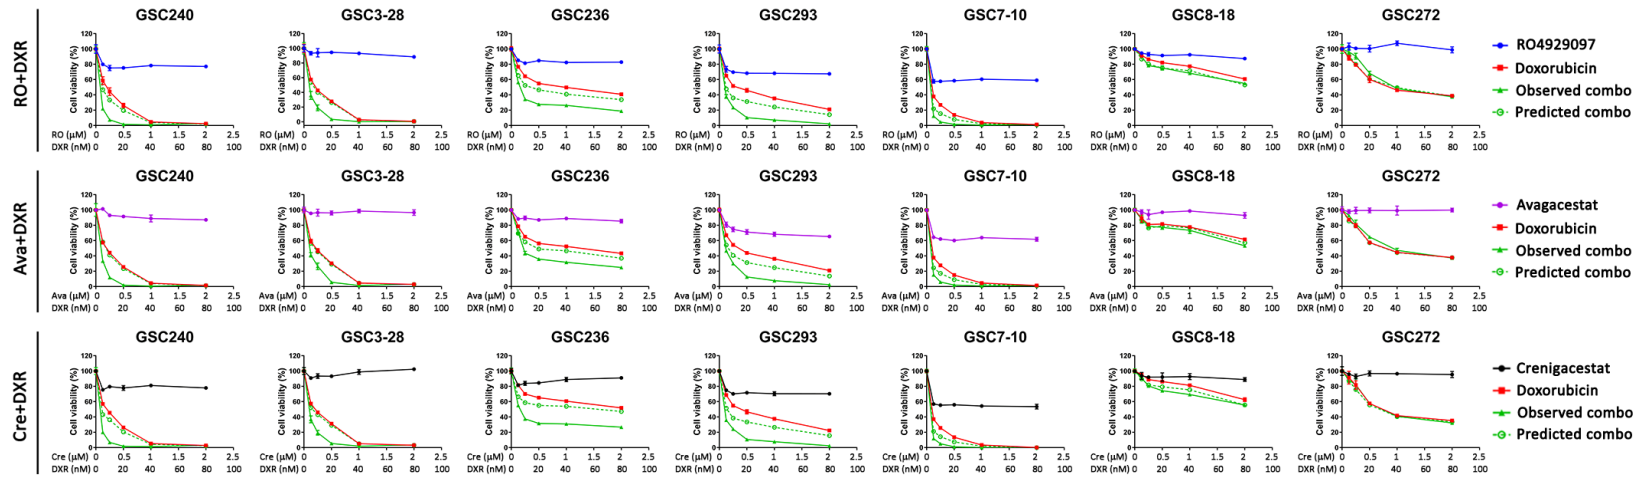

**Figure S7.** Validation group. The effect of GSI (RO, avagacestat, or crenigacestat) and doxorubicin treatment (5 days) on GSC proliferation. n = 3.

NOTCH signaling and wt-p53 interaction in GSCs

GSC13

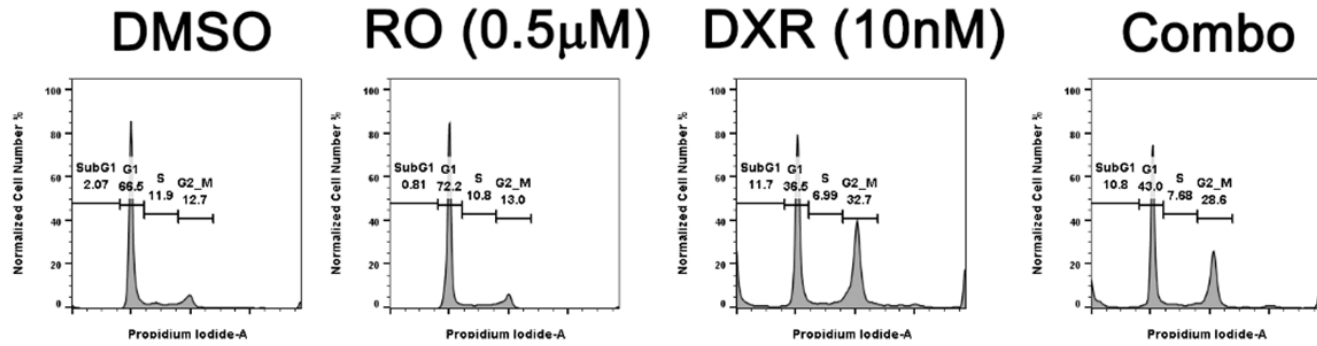

GSC293

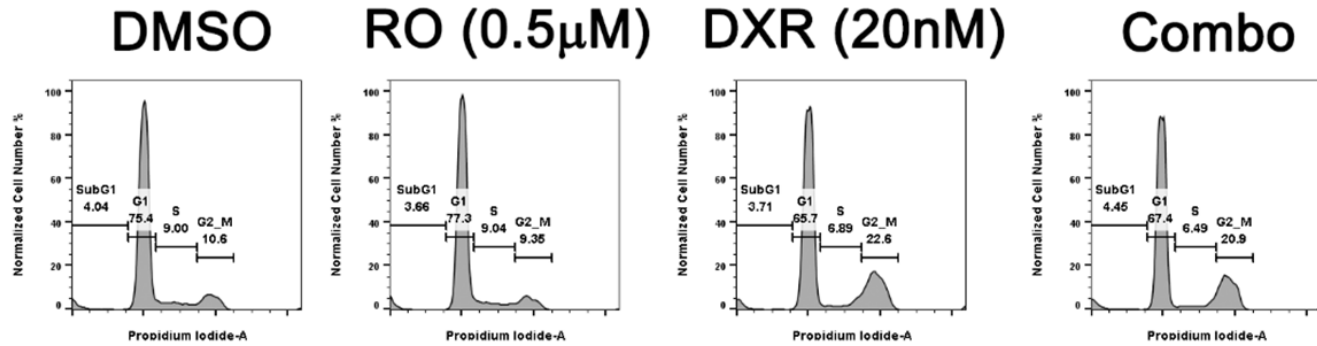

GSC23

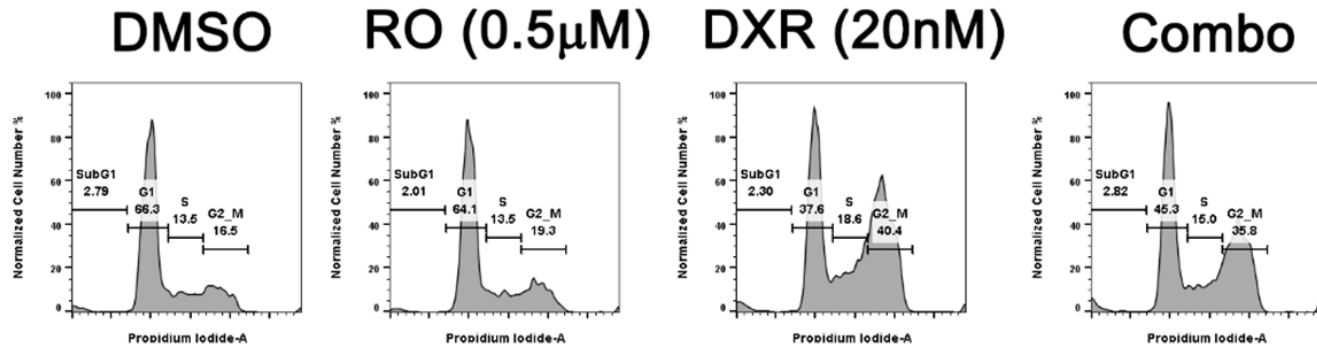

DMSO RO (0.5µM) DXR (15nM) Combo



## NOTCH signaling and wt-p53 interaction in GSCs

GSC7-11

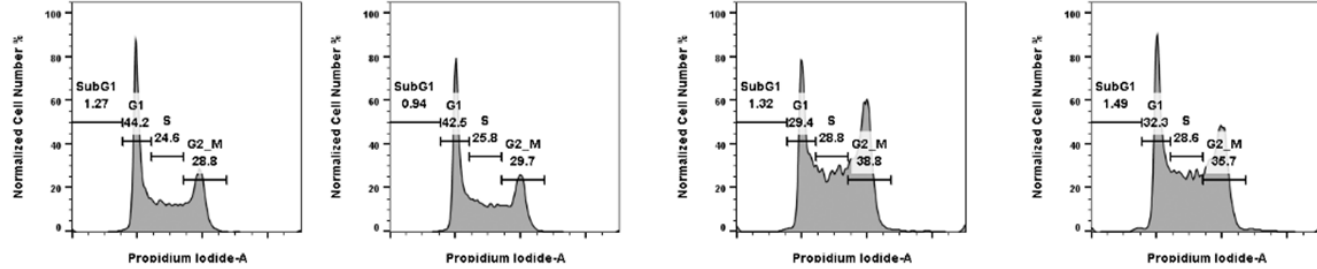

**Figure S8.** GSI and doxorubicin combination did not induce additional cell cycle arrest. GSCs were treated for 24 hours. Doxorubicin alone induced G2/M arrest in all four GSCs, while RO treatment did not facilitate doxorubicin to induce more cell cycle arrest. Doxorubicin concentration for apoptosis detection was determined by IC50 for each GSC. n = 3. Blue font: wt-p53 cells. Red font: mut-p53 cells.

NOTCH signaling and wt-p53 interaction in GSCs

GSC13

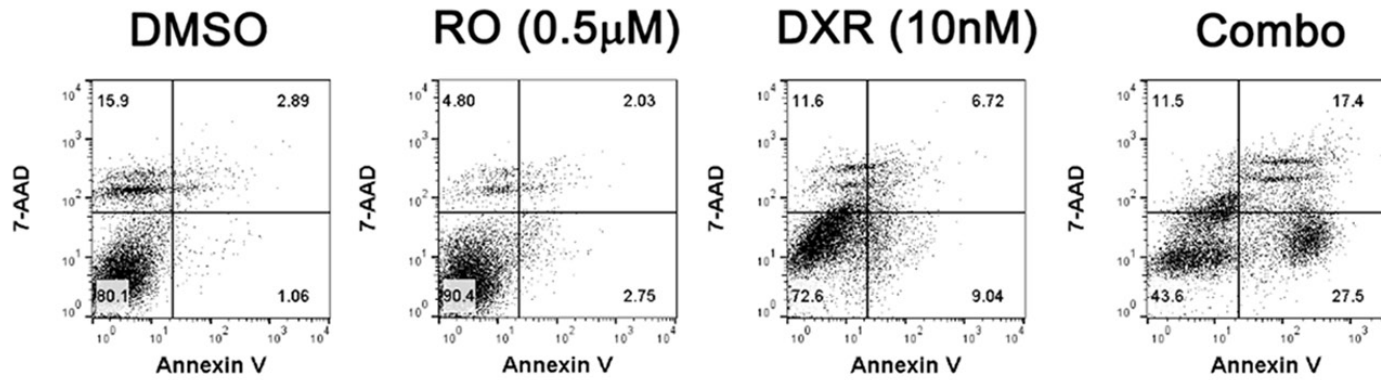

GSC293

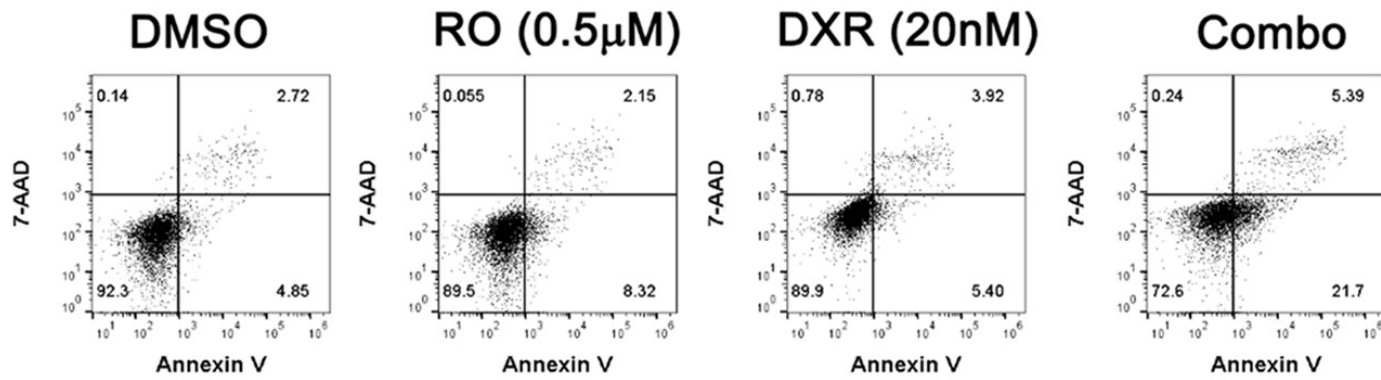

GSC23

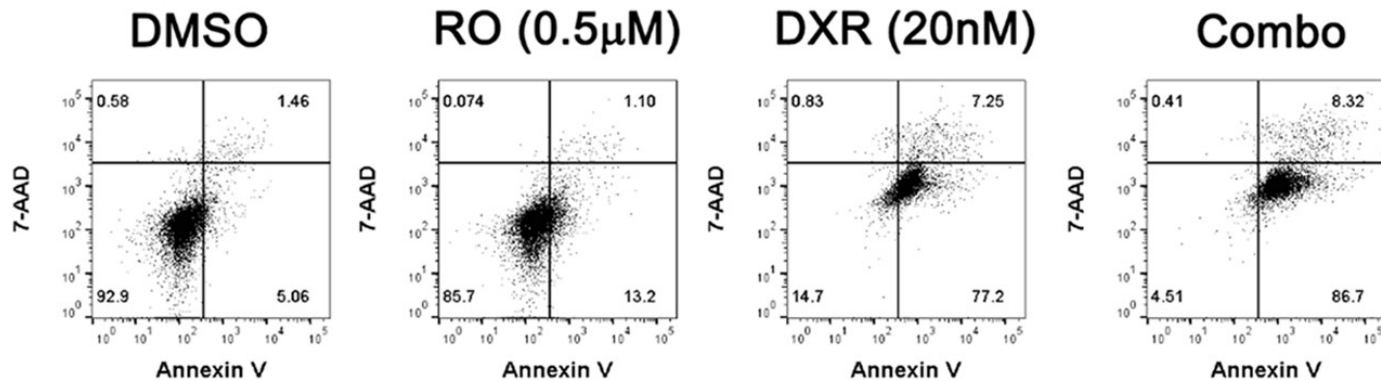

NOTCH signaling and wt-p53 interaction in GSCs

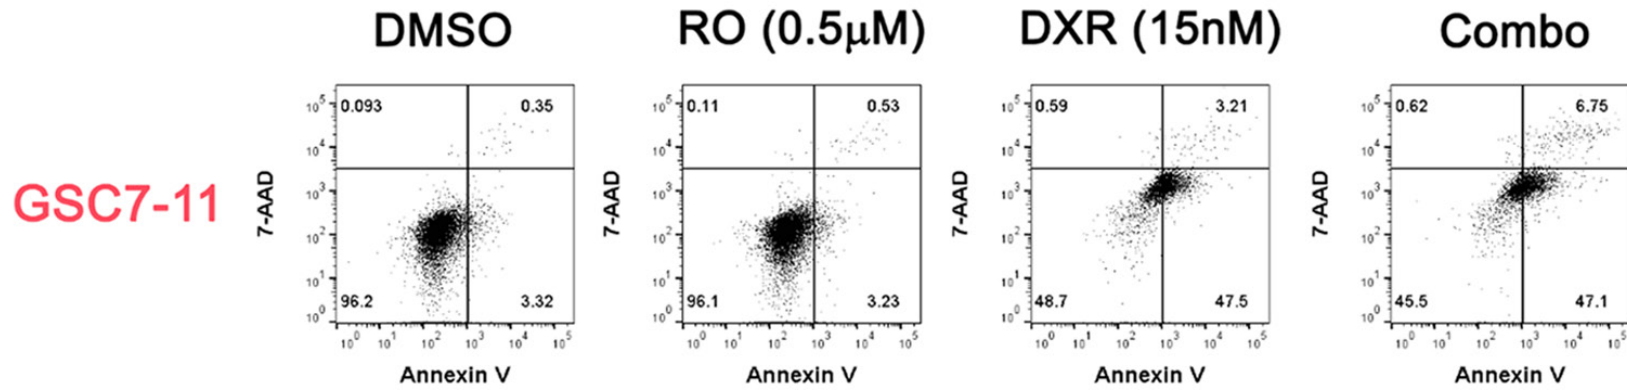

**Figure S9.** GSI and doxorubicin combination induced more apoptosis in wt-p53 GSCs. GSCs were treated for 24 hours and then stained with FITC-annexin V/7-AAD. Doxorubicin concentration for apoptosis detection was determined by IC50 for each GSC. n = 3. Blue font: wt-p53 cells. Red font: mut-p53 cells.

NOTCH signaling and wt-p53 interaction in GSCs

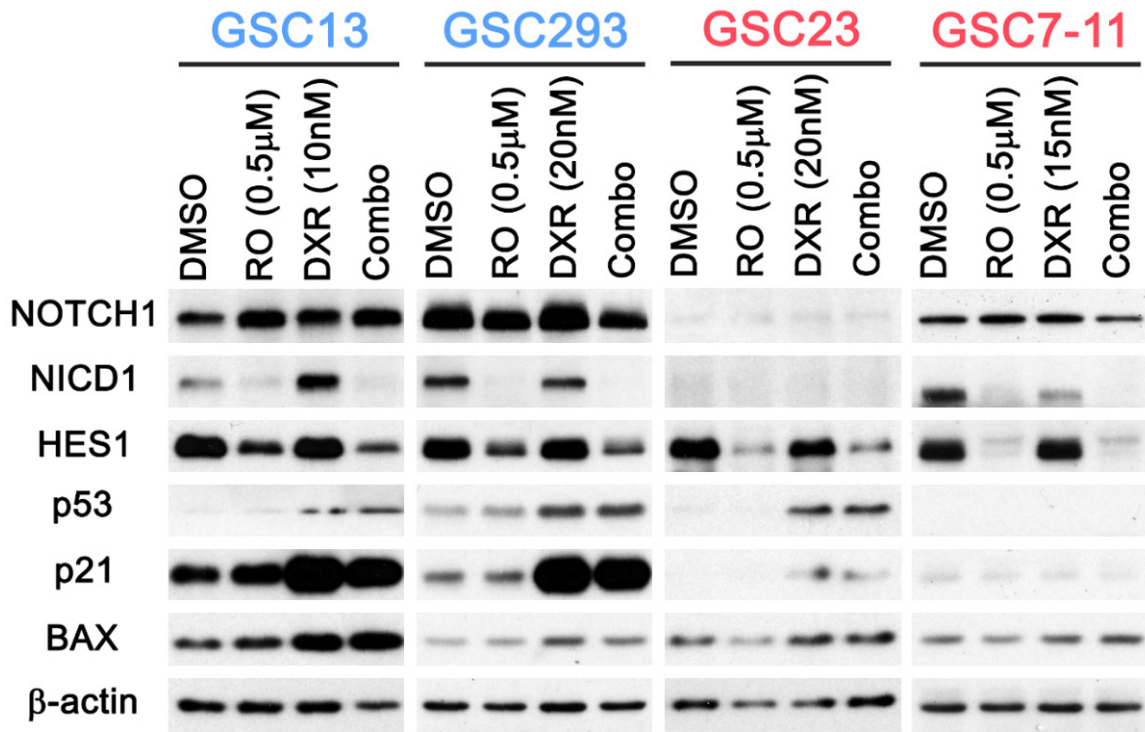

**Figure S10.** Effect of GSI and doxorubicin combination on NOTCH1 and p53 pathway expression. GSCs were treated for 24 hours and then subjected to Western blot analysis. Doxorubicin concentration for apoptosis detection was determined by IC50 for each GSC. n = 3. Blue font: wt-p53 cells. Red font: mut-p53 cells.
